# Supplementary material for: DNA Barcoding and Distribution of Gastropods and Malacostracans in the Lower Danube Region
Source: MDPI journal article supplement (doi:10.3390/d14070533), 2022-06-30
Supplement: s1 [file s1]

# *SUPPLEMENTARY MATERIAL*

## **DNA barcoding and distribution of gastropods and malacostracan amphipods and mysids in the Lower Danube Region**

Selma Menabit<sup>1,2</sup>, Tatiana Beguș, Adrian Teacă<sup>1</sup>, Mihaela Mureșan<sup>1</sup>, Paris Lavîș, Cristina Purcarea<sup>2,\*</sup>

<sup>1</sup>National Institute of Marine Geology and Geo-Ecology (GeoEcoMar), 024053  
Bucharest, Romania

<sup>2</sup>Institute of Biology of the Romanian Academy, Department of Microbiology, 060031  
Bucharest, Romania

<sup>3</sup>Facultad de Ciencias del Mar y Recursos Biológicos, Departamento de Biotecnología,  
Universidad de Antofagasta, Antofagasta, 1240000, Chile

\* Corresponding author: [cristina.purcarea@ibiol.ro](mailto:cristina.purcarea@ibiol.ro)

**Table S1.** Specimen taxonomy and accession number, sampling period and location, best match COI gene sequence for gastropod, amphipod and mysid species isolated from the Lower Danube Sector

| Order             | Family          | Species                                                     | Specimen accession number | Year of sampling | Coordinates  |              | Best match COI gene sequence |           |                   |
|-------------------|-----------------|-------------------------------------------------------------|---------------------------|------------------|--------------|--------------|------------------------------|-----------|-------------------|
|                   |                 |                                                             |                           |                  | Lat. (α)     | Long. (λ)    | Identity (%)                 | Cover (%) | GenBank reference |
| Gastropoda        |                 |                                                             |                           |                  |              |              |                              |           |                   |
| Caenogastropoda   | Amphimelaniidae | <i>Holandriana holandrii</i> C. Pfeiffer, 1828              | ON000192                  | 2021             | 43°44′13.0″  | 23°59′4.3″   | 100                          | 98        | MK094080          |
|                   |                 | <i>H. holandrii</i>                                         | ON000184                  | 2021             | 43°44′13.0″  | 23°59′4.3″   | 99.36                        | 99        | FJ652189          |
|                   | Melanopsidae    | <i>Microcolpia daudebartii acicularis</i> A. Férussac, 1823 | MW139680                  | 2019             | 45°13′36.23″ | 28°43′57.49′ | 99.37                        | 99        | FJ652188          |
| Architaenioglossa | Viviparidae     | <i>Viviparus viviparus</i> Linnaeus, 1758                   | ON000180                  | 2021             | 45°13′36.23″ | 28°43′57.49′ | 99.25                        | 98        | MK517417          |
|                   |                 | <i>V. viviparus</i>                                         | ON000191                  | 2021             | 45°10′53.65″ | 29.204784    | 99                           | 99        | MT483648          |
|                   |                 | <i>V. viviparus</i>                                         | ON000197                  | 2021             | 45°10′53.65″ | 29.204784    | 99.25                        | 98        | MK517417          |
| Littorinimorpha   | Bithyniidae     | <i>Bithynia tentaculata</i> Linnaeus, 1758                  | MW139681                  | 2019             | 45°13′36.23″ | 28°43′57.49′ | 99.17                        | 98        | MK308219          |
|                   |                 | <i>B. tentaculata</i>                                       | MW139682                  | 2019             | 45°10′35.34″ | 29°28′28.66′ | 99.20                        | 98%       | MK308219          |
| Cycloneritida     | Neritidae       | <i>Theodoxus transversalis</i> C. Pfeiffer, 1828            | MW139678                  | 2019             | 43°44′13.0″  | 23°59′4.3″   | 100                          | 100       | HM171591          |
| Hygrophila        | Lymnaeidae      | <i>Ampullaceana lagotis</i> Schrank, 1803                   | MW600073                  | 2020             | 45°24′19.16″ | 29°33′12.71′ | 99.27                        | 98        | LT623602          |
|                   |                 | <i>A. lagotis</i>                                           | ON000193                  | 2021             | 45°24′19.16″ | 29°33′12.71′ | 99.94                        | 98        | LT623602          |
|                   |                 | <i>A. lagotis</i>                                           | ON036036                  | 2021             | 45°24′19.16″ | 29°33′12.71′ | 99.46                        | 100       | LT623602          |
|                   | Physidae        | <i>Physa fontinalis</i> Linnaeus, 1758                      | MW600069                  | 2020             | 45°10′53.65″ | 29.204784    | 99.42                        | 98        | FJ373018          |
|                   | Planorbidae     | <i>Planorbarius corneus</i> Linnaeus, 1758                  | MW600083                  | 2020             | 45°10′53.65″ | 29.204784    | 99                           | 100       | MT862415          |
|                   |                 | <i>Gyraulus parvus</i> Say, 1817                            | ON000188                  | 2021             | 43°44′13.0″  | 23°59′4.3″   | 99.38                        | 98        | MK308021          |
|                   |                 | <i>G. parvus</i>                                            |                           | 2021             | 43°44′13.0″  | 23°59′4.3″   | 99.20                        | 98        | MK308021          |
| Malacostraca      |                 |                                                             |                           |                  |              |              |                              |           |                   |
| Amphipoda         | Corophiidae     | <i>Chelicorophium robustum</i> G.O. Sars, 1895              | MW139683                  | 2019             | 45°13′36.23″ | 28°43′57.49′ | 99.64                        | 98        | KM009061          |

|        |            |                                                               |          |      |               |              |       |     |              |
|--------|------------|---------------------------------------------------------------|----------|------|---------------|--------------|-------|-----|--------------|
|        |            | <i>C. robustum</i>                                            | ON000195 | 2021 | 45°13'36.23'' | 28°43'57.49' | 99.83 | 98  | MN34323<br>7 |
|        | Gammaridae | <i>Dikerogammarus haemobaphes</i><br>Eichwald, 1841           | MW600074 | 2020 | 45°24'19.16'' | 29°33'12.71' | 99.51 | 100 | MN34323<br>7 |
|        |            | <i>D. haemobaphes</i>                                         | MW600089 | 2020 | 45°24'19.16'' | 29°33'12.71' | 99.84 | 100 | MN34323<br>7 |
|        |            | <i>D. haemobaphes</i>                                         | ON000187 | 2021 | 45°10'35.34'' | 29°28'28.66' | 99.83 | 100 | MN34323<br>7 |
|        |            | <i>D. haemobaphes</i>                                         | ON000189 | 2021 | 45°10'35.34'' | 29°28'28.66' | 99.84 | 100 | MN34323<br>7 |
|        |            | <i>Dikerogammarus villosus</i> Sowinsky,<br>1894              | MW600090 | 2020 | 45°13'36.23'' | 28°43'57.49' | 99.53 | 98  | MK15994<br>2 |
| Mysida | Misidae    | <i>Limnomysis benedeni</i> Czerniavsky, 1882                  | MW600070 | 2020 | 45°10'35.34'' | 29°28'28.66' | 99.51 | 98  | AY529021     |
|        |            | <i>L. benedeni</i>                                            | MW600071 | 2020 | 45°10'35.34'' | 29°28'28.66' | 99.84 | 98  | AY529018     |
|        |            | <i>L. benedeni</i>                                            | MW600072 | 2020 | 45°10'35.34'' | 29°28'28.66' | 98    | 98  | AY529018     |
|        |            | <i>L. benedeni</i>                                            | ON000186 | 2021 | 45°10'35.34'' | 29°28'28.66' | 99.84 | 98  | AY529021     |
|        |            | <i>Paramysis (Serrapalpis) lacustris</i><br>Czerniavsky, 1882 | MW600085 | 2020 | 45°10'35.34'' | 29°28'28.66' | 99.47 | 98  | KT193643     |

**Table S2.** Taxonomy assignment by the INSECT R package for all COI sequences used on the present research (including sequences recovered from NCBI)

| Representative                         | Accession number | TaxID   | Taxon                   | Rank         | Score  | Kingdom | Phylum     | Class        | Order     | Family     | Genus                 | Species                        |
|----------------------------------------|------------------|---------|-------------------------|--------------|--------|---------|------------|--------------|-----------|------------|-----------------------|--------------------------------|
| <b>Malacostraca</b>                    |                  |         |                         |              |        |         |            |              |           |            |                       |                                |
| <i>Dikerogammarus haemobaphes</i>      | MW600074         | 44329   | Gammaroidea             | superfamily  | 0.9754 | Metazoa | Arthropoda | Malacostraca | Amphipoda |            |                       |                                |
| <i>Dikerogammarus haemobaphes</i>      | MW600089         | 44329   | Gammaroidea             | superfamily  | 0.9754 | Metazoa | Arthropoda | Malacostraca | Amphipoda |            |                       |                                |
| <i>Dikerogammarus haemobaphes</i>      | ON000187         | 1       | root                    | no rank      | NA     |         |            |              |           |            |                       |                                |
| <i>Dikerogammarus haemobaphes</i>      | ON000189         | 2759    | Eukaryota               | superkingdom | 1      |         |            |              |           |            |                       |                                |
| <i>Dikerogammarus villosus</i>         | MW600090         | 191519  | Dikerogammarus          | genus        | 1      | Metazoa | Arthropoda | Malacostraca | Amphipoda | Gammaridae | <i>Dikerogammarus</i> |                                |
| <i>Dikerogammarus villosus</i>         | KM208875         | 191522  | Dikerogammarus villosus | species      | NA     | Metazoa | Arthropoda | Malacostraca | Amphipoda | Gammaridae | <i>Dikerogammarus</i> | <i>Dikerogammarus villosus</i> |
| <i>Chelicerophium curvispinum</i>      | MN556090         | 1732196 | Senticaudata            | suborder     | 1      | Metazoa | Arthropoda | Malacostraca | Amphipoda |            |                       |                                |
| <i>Chelicerophium robustum</i>         | MW139683         | 1732196 | Senticaudata            | suborder     | 1      | Metazoa | Arthropoda | Malacostraca | Amphipoda |            |                       |                                |
| <i>Chelicerophium robustum</i>         | ON000195         | 1       | root                    | no rank      | NA     |         |            |              |           |            |                       |                                |
| <i>Paramysis intermedia</i>            | DQ779850         | 1       | root                    | no rank      | NA     |         |            |              |           |            |                       |                                |
| <i>Paramysis (Mesomysis) lacustris</i> | MW600085         | 401129  | Mysinae                 | subfamily    | 0.9935 | Metazoa | Arthropoda | Malacostraca | Mysida    | Mysidae    |                       |                                |
| <i>Paramysis (Mesomysis) lacustris</i> | DQ779845         | 1       | root                    | no rank      | NA     |         |            |              |           |            |                       |                                |
| <i>Limnomysis benedeni</i>             | MW600072         | 2759    | Eukaryota               | superkingdom | 1      |         |            |              |           |            |                       |                                |

|                              |          |         |                      |              |        |         |          |            |                   |               |                     |                             |
|------------------------------|----------|---------|----------------------|--------------|--------|---------|----------|------------|-------------------|---------------|---------------------|-----------------------------|
| <i>Limnomysis benedeni</i>   | MW600071 | 2759    | Eukaryota            | superkingdom | 1      |         |          |            |                   |               |                     |                             |
| <i>Limnomysis benedeni</i>   | MW600070 | 2759    | Eukaryota            | superkingdom | 1      |         |          |            |                   |               |                     |                             |
| <i>Limnomysis benedeni</i>   | ON000186 | 2759    | Eukaryota            | superkingdom | 1      |         |          |            |                   |               |                     |                             |
| <b>Gastropoda</b>            |          |         |                      |              |        |         |          |            |                   |               |                     |                             |
| <i>Planorbarius corneus</i>  | MW600083 | 6524    | Planorbidae          | family       | 1      | Metazoa | Mollusca | Gastropoda |                   | Planorbidae   |                     |                             |
| <i>Planorbarius corneus</i>  | AY282590 | 240818  | Planorbarius corneus | species      | NA     | Metazoa | Mollusca | Gastropoda |                   | Planorbidae   | <i>Planorbarius</i> | <i>Planorbarius corneus</i> |
| <i>Gyraulus albus</i>        | MZ127279 | 1       | root                 | no rank      | NA     |         |          |            |                   |               |                     |                             |
| <i>Gyraulus parvus</i>       | ON000188 | 6448    | Gastropoda           | class        | 0.9746 | Metazoa | Mollusca | Gastropoda |                   |               |                     |                             |
| <i>Gyraulus parvus</i>       | ON000194 | 2759    | Eukaryota            | superkingdom | 1      |         |          |            |                   |               |                     |                             |
| <i>Physella acuta</i>        | MK919687 | 1       | root                 | no rank      | NA     |         |          |            |                   |               |                     |                             |
| <i>Physa fontinalis</i>      | MW600069 | 109669  | Physidae             | family       | 1      | Metazoa | Mollusca | Gastropoda |                   | Physidae      |                     |                             |
| <i>Physa fontinalis</i>      | FJ373018 | 146087  | Physa fontinalis     | species      | NA     | Metazoa | Mollusca | Gastropoda |                   | Physidae      | <i>Physa</i>        | <i>Physa fontinalis</i>     |
| <i>Ampullaceana balthica</i> | AY227364 | 582868  | Radix balthica       | species      | NA     | Metazoa | Mollusca | Gastropoda |                   | Lymnaeidae    | <i>Radix</i>        | <i>Radix balthica</i>       |
| <i>Ampullaceana lagotis</i>  | ON036036 | 2759    | Eukaryota            | superkingdom | 1      |         |          |            |                   |               |                     |                             |
| <i>Ampullaceana lagotis</i>  | MW600073 | 216307  | Euthyneura           | no rank      | 0.9999 | Metazoa | Mollusca | Gastropoda |                   |               |                     |                             |
| <i>Ampullaceana lagotis</i>  | ON000193 | 55689   | Radix                | genus        | 1      | Metazoa | Mollusca | Gastropoda |                   | Lymnaeidae    | <i>Radix</i>        |                             |
| <i>Viviparus acerosus</i>    | MK517425 | 1       | root                 | no rank      | 1      |         |          |            |                   |               |                     |                             |
| <i>Viviparus viviparus</i>   | ON000191 | 1206795 | Lophotrochozoa       | no rank      | 0.9931 | Metazoa |          |            |                   |               |                     |                             |
| <i>Viviparus viviparus</i>   | ON000180 | 54973   | Ampullariidae        | family       | 1      | Metazoa | Mollusca | Gastropoda | Architaenioglossa | Ampullariidae |                     |                             |

|                                           |          |         |                                           |              |        |         |          |            |                   |               |             |                                |
|-------------------------------------------|----------|---------|-------------------------------------------|--------------|--------|---------|----------|------------|-------------------|---------------|-------------|--------------------------------|
| <i>Viviparus viviparus</i>                | ON000197 | 54973   | Ampullariidae                             | family       | 1      | Metazoa | Mollusca | Gastropoda | Architaenioglossa | Ampullariidae |             |                                |
| <i>Esperiana esperi</i>                   | KJ831022 | 69555   | Caenogastropoda                           | subclass     | 1      | Metazoa | Mollusca | Gastropoda |                   |               |             |                                |
| <i>Holandriana holandrii</i>              | ON000184 | 1       | root                                      | no rank      | NA     |         |          |            |                   |               |             |                                |
| <i>Holandriana holandrii</i>              | ON000192 | 1206795 | Lophotrochozoa                            | no rank      | 1      | Metazoa |          |            |                   |               |             |                                |
| <i>Bithynia leachii</i>                   | MW138416 | 2759    | Eukaryota                                 | superkingdom | 1      |         |          |            |                   |               |             |                                |
| <i>Bithynia tentaculata</i>               | MW139681 | 1206795 | Lophotrochozoa                            | no rank      | 1      | Metazoa |          |            |                   |               |             |                                |
| <i>Bithynia tentaculata</i>               | MW139682 | 1206795 | Lophotrochozoa                            | no rank      | 0,988  | Metazoa |          |            |                   |               |             |                                |
| <i>Microcolpia daudebartii acicularis</i> | MW139680 | 1206795 | Lophotrochozoa                            | no rank      | 0.9834 | Metazoa |          |            |                   |               |             |                                |
| <i>Microcolpia daudebartii acicularis</i> | FJ652188 | 1620826 | <i>Microcolpia daudebartii acicularis</i> | subspecies   | NA     | Metazoa | Mollusca | Gastropoda |                   | Melanopsidae  | Microcolpia | <i>Microcolpia daudebartii</i> |
| <i>Theodoxus transversalis</i>            | MW139678 | 313645  | <i>Theodoxus transversalis</i>            | species      | NA     | Metazoa | Mollusca | Gastropoda | Cycloneritida     | Neritidae     | Theodoxus   | <i>Theodoxus transversalis</i> |
| <i>Theodoxus transversalis</i>            | HM171591 | 313645  | <i>Theodoxus transversalis</i>            | species      | NA     | Metazoa | Mollusca | Gastropoda | Cycloneritida     | Neritidae     | Theodoxus   | <i>Theodoxus transversalis</i> |
| <i>Theodoxus danubialis</i>               | GQ365727 | 2759    | Eukaryota                                 | superkingdom | 1      |         |          |            |                   |               |             |                                |
| <i>Theodoxus fluviatilis</i>              | MK754596 | 2759    | Eukaryota                                 | superkingdom | 1      |         |          |            |                   |               |             |                                |
